# Supplementary material for: The Effect of Serine Protease Inhibitors on Visceral Pain in Different Rodent Models With an Intestinal Insult
Source: Frontiers journal article supplement (doi:10.3389/fphar.2022.765744), 2022-06-02
Supplement: Data_Sheet_1.pdf [file Data_Sheet_1.pdf]

**1. Inflammatory parameters acute colitis rats UAMC-00050**

- Data are not normally distributed (Shapiro-Wilk test).
- Equality of variances cannot be assumed (Levene's test).
- Non-parametric testing was performed on these data with a Kruskal-Wallis test and pairwise comparisons with Bonferroni correction for multiple tests.
- p-values for colonoscopy day 3

| Sample 1 – Sample 2 | p-value |
|---------------------|---------|
| 0-4                 | 1,000   |
| 0-2                 | 0,005   |
| 0-1                 | 0,003   |
| 0-3                 | 0,000   |
| 4-2                 | 0,005   |
| 4-1                 | 0,003   |
| 4-3                 | 0,000   |
| 2-1                 | 0,905   |
| 2-3                 | 0,484   |
| 1-3                 | 0,561   |

Each row tests the null hypothesis that the Sample 1 and Sample 2 distributions are the same.  
 Group 0 = control + vehicle; Group 1 = TNBS + vehicle; Group 2 = TNBS + 0.1 mg/kg UAMC;  
 Group 3 = TNBS + 1 mg/kg UAMC; Group 4 = control + 1 mg/kg UAMC

- p-values for macroscopy

| Sample 1 – Sample 2 | p-value |
|---------------------|---------|
| 0-4                 | 1,000   |
| 0-1                 | 0,011   |
| 0-2                 | 0,001   |
| 0-3                 | 0,000   |
| 4-1                 | 0,011   |
| 4-2                 | 0,001   |
| 4-3                 | 0,000   |
| 1-2                 | 0,429   |
| 1-3                 | 0,268   |
| 2-3                 | 0,752   |

Each row tests the null hypothesis that the Sample 1 and Sample 2 distributions are the same.  
 Group 0 = control + vehicle; Group 1 = TNBS + vehicle; Group 2 = TNBS + 0.1 mg/kg UAMC;  
 Group 3 = TNBS + 1 mg/kg UAMC; Group 4 = control + 1 mg/kg UAMC

Supplementary file 1 - Details on statistical analysis of all data included in the manuscript

➤ p-values for microscopy

| Sample 1 – Sample 2 | p-value |
|---------------------|---------|
| 4-0                 | 0,687   |
| 4-1                 | 0,007   |
| 4-3                 | 0,001   |
| 4-2                 | 0,000   |
| 0-1                 | 0,021   |
| 0-3                 | 0,002   |
| 0-2                 | 0,002   |
| 1-3                 | 0,460   |
| 1-2                 | 0,440   |
| 3-2                 | 0,973   |

Each row tests the null hypothesis that the Sample 1 and Sample 2 distributions are the same.  
 Group 0 = control + vehicle; Group 1 = TNBS + vehicle; Group 2 = TNBS + 0.1 mg/kg UAMC;  
 Group 3 = TNBS + 1 mg/kg UAMC; Group 4 = control + 1 mg/kg UAMC

➤ p-values for MPO activity

| Sample 1 – Sample 2 | p-value |
|---------------------|---------|
| 4-0                 | 0,974   |
| 4-1                 | 0,010   |
| 4-2                 | 0,007   |
| 4-3                 | 0,004   |
| 0-1                 | 0,011   |
| 0-2                 | 0,008   |
| 0-3                 | 0,004   |
| 1-2                 | 0,922   |
| 1-3                 | 0,768   |
| 2-3                 | 0,844   |

Each row tests the null hypothesis that the Sample 1 and Sample 2 distributions are the same.  
 Group 0 = control + vehicle; Group 1 = TNBS + vehicle; Group 2 = TNBS + 0.1 mg/kg UAMC;  
 Group 3 = TNBS + 1 mg/kg UAMC; Group 4 = control + 1 mg/kg UAMC

## 2. Inflammatory parameters acute colitis rats nafamostat

- Data are not normally distributed (Shapiro-Wilk test).
- Equality of variances cannot be assumed for colonoscopy, macroscopy and MPO activity. Equality of variances can be assumed for microscopy (Levene's test).
- Non-parametric testing was performed on these data with a Kruskal-Wallis test and pairwise comparisons with Bonferroni correction for multiple tests.
- p-values for colonoscopy day 3

| Sample 1 – Sample 2 | p-value |
|---------------------|---------|
| 1-6                 | 1,000   |
| 1-5                 | 0,006   |
| 1-3                 | 0,004   |
| 1-4                 | 0,003   |
| 1-2                 | 0,000   |
| 6-5                 | 0,006   |
| 6-3                 | 0,004   |
| 6-4                 | 0,003   |
| 6-2                 | 0,000   |
| 5-3                 | 0,933   |
| 5-4                 | 0,833   |
| 5-2                 | 0,441   |
| 3-4                 | 0,900   |
| 3-2                 | 0,492   |
| 4-2                 | 0,575   |

Each row tests the null hypothesis that the Sample 1 and Sample 2 distributions are the same.  
 Group 1 = control + vehicle; Group 2 = TNBS + vehicle; Group 3 = TNBS + 0.1 mg/kg nafamostat;  
 Group 4 = TNBS + 1 mg/kg nafamostat; Group 5 = TNBS + 10 mg/kg nafamostat; Group 6 = Control + 10 mg/kg nafamostat

- p-values for macroscopy

| Sample 1 – Sample 2 | p-value |
|---------------------|---------|
| 1-6                 | 1,000   |
| 1-3                 | 0,006   |
| 1-2                 | 0,002   |
| 1-4                 | 0,001   |
| 1-5                 | 0,001   |
| 6-3                 | 0,006   |
| 6-2                 | 0,002   |
| 6-4                 | 0,001   |
| 6-5                 | 0,001   |
| 3-2                 | 0,762   |
| 3-4                 | 0,624   |
| 3-5                 | 0,555   |
| 2-4                 | 0,852   |
| 2-5                 | 0,773   |
| 4-5                 | 0,920   |

Each row tests the null hypothesis that the Sample 1 and Sample 2 distributions are the same.  
 Group 1 = control + vehicle; Group 2 = TNBS + vehicle; Group 3 = TNBS + 0.1 mg/kg nafamostat;  
 Group 4 = TNBS + 1 mg/kg nafamostat; Group 5 = TNBS + 10 mg/kg nafamostat; Group 6 = Control + 10 mg/kg nafamostat

Supplementary file 1 - Details on statistical analysis of all data included in the manuscript

➤ p-values for microscopy

| Sample 1 – Sample 2 | p-value |
|---------------------|---------|
| 6-1                 | 0,857   |
| 6-2                 | 0,014   |
| 6-5                 | 0,003   |
| 6-4                 | 0,001   |
| 6-3                 | 0,000   |
| 1-2                 | 0,023   |
| 1-5                 | 0,006   |
| 1-4                 | 0,002   |
| 1-3                 | 0,001   |
| 2-5                 | 0,637   |
| 2-4                 | 0,412   |
| 2-3                 | 0,266   |
| 5-4                 | 0,728   |
| 5-3                 | 0,523   |
| 4-3                 | 0,770   |

Each row tests the null hypothesis that the Sample 1 and Sample 2 distributions are the same.

Group 1 = control + vehicle; Group 2 = TNBS + vehicle; Group 3 = TNBS + 0.1 mg/kg nafamostat;

Group 4 = TNBS + 1 mg/kg nafamostat; Group 5 = TNBS + 10 mg/kg nafamostat; Group 6 = Control + 10 mg/kg nafamostat

➤ p-values for MPO activity

| Sample 1 – Sample 2 | p-value |
|---------------------|---------|
| 1-6                 | 0,826   |
| 1-4                 | 0,008   |
| 1-5                 | 0,003   |
| 1-2                 | 0,002   |
| 1-3                 | 0,001   |
| 6-4                 | 0,015   |
| 6-5                 | 0,006   |
| 6-2                 | 0,003   |
| 6-3                 | 0,001   |
| 4-5                 | 0,773   |
| 4-2                 | 0,622   |
| 4-3                 | 0,435   |
| 5-2                 | 0,837   |
| 5-3                 | 0,622   |
| 2-3                 | 0,773   |

Each row tests the null hypothesis that the Sample 1 and Sample 2 distributions are the same.

Group 1 = control + vehicle; Group 2 = TNBS + vehicle; Group 3 = TNBS + 0.1 mg/kg nafamostat;

Group 4 = TNBS + 1 mg/kg nafamostat; Group 5 = TNBS + 10 mg/kg nafamostat; Group 6 = Control + 10 mg/kg nafamostat

### 3. mRNA expression control vs acute colitis

- Data are not normally distributed for tryptase and KLK8. Data are normally distributed for matriptase and uPA (Shapiro-Wilk test).
- Equality of variances cannot be assumed for tryptase. Equality of variances can be assumed for matriptase, uPA and KLK8 (Levene's test).
- Non-parametric testing with a Mann-Whitney U test was performed for tryptase and KLK8.
- Independent samples T-test was performed for matriptase and uPA.
- p-values

| Variable   | p-value |
|------------|---------|
| Tryptase   | 0,834   |
| KLK8       | 0,248   |
| Matriptase | 0,001   |
| uPA        | 1,000   |

### 4. VMR UAMC-00050 acute colitis

- Generalized Estimating Equations with Least Significant Difference post-hoc test was performed. Since there was a significant interaction between the factors "colitis\_vs\_control" and "dose", the pairwise comparisons between these factors were explored.
- Test of Model Effects

| Variable                                 | p-value |
|------------------------------------------|---------|
| Colitis_vs_control                       | 0,037   |
| Dose                                     | 0,060   |
| Pressure_AUC                             | 0,000   |
| Colitis_vs_control * Dose                | 0,008   |
| Colitis_vs_control * Pressure_AUC        | 0,102   |
| Dose * Pressure_AUC                      | 0,083   |
| Colitis_vs_control * Dose * Pressure_AUC | 0,157   |

- Pairwise comparisons: Colitis\_vs\_control \* Dose (with Bonferroni-Holm correction for multiple use of the vehicle-treated groups)

| Variable 1        | Variable 2                     | p-value |
|-------------------|--------------------------------|---------|
| Control + vehicle | Control + 1 mg/kg UAMC-00050   | 1.000   |
| Control + vehicle | Colitis + vehicle              | 0.040   |
| Colitis + vehicle | Colitis + 0.1 mg/kg UAMC-00050 | 1.000   |
| Colitis + vehicle | Colitis + 1 mg/kg UAMC-00050   | 0.001   |

**5. VMR nafamostat acute colitis**

- Generalized Estimating Equations with Least Significant Difference post-hoc test was performed. Since there was a significant interaction between the factors “colitis\_vs\_control” and “dose” as well as “colitis\_vs\_control” and “pressure\_AUC”, the pairwise comparisons between these factors were explored.
- Test of Model Effects

| Variable                                 | p-value |
|------------------------------------------|---------|
| Colitis_vs_control                       | 0,133   |
| Dose                                     | 0,129   |
| Pressure_AUC                             | 0,000   |
| Colitis_vs_control * Dose                | 0,016   |
| Colitis_vs_control * Pressure_AUC        | 0,696   |
| Dose * Pressure_AUC                      | 0,000   |
| Colitis_vs_control * Dose * Pressure_AUC | 0,086   |

- Pairwise comparisons: Colitis\_vs\_control \* Dose (with Bonferroni-Holm correction for multiple use of the vehicle-treated groups)

| Variable 1        | Variable 2                     | p-value |
|-------------------|--------------------------------|---------|
| Control + vehicle | Control + 10 mg/kg nafamostat  | 1,000   |
| Control + vehicle | Colitis + vehicle              | 0,071   |
| Colitis + vehicle | Colitis + 0.1 mg/kg nafamostat | 1,000   |
| Colitis + vehicle | Colitis + 1 mg/kg nafamostat   | 1,000   |
| Colitis + vehicle | Colitis + 10 mg/kg nafamostat  | 0,065   |

## 6. VMR UAMC-00050 and nafamostat acetic acid model

- Generalized Estimating Equations with Least Significant Difference post-hoc test was performed. Since there was a significant interaction between the factors “colitis\_vs\_control” and “dose”, the pairwise comparisons between these factors were explored.
- Test of Model Effects

| Variable                                 | p-value |
|------------------------------------------|---------|
| Colitis_vs_control                       | 0,109   |
| Dose                                     | 0,047   |
| Pressure_AUC                             | 0,000   |
| Colitis_vs_control * Dose                | 0,001   |
| Colitis_vs_control * Pressure_AUC        | 0,499   |
| Dose * Pressure_AUC                      | 0,330   |
| Colitis_vs_control * Dose * Pressure_AUC | 0,062   |

- Pairwise comparisons : Colitis\_vs\_control \* Dose

| Variable 1        | Variable 2           | p-value |
|-------------------|----------------------|---------|
| Control + vehicle | Control + UAMC-00050 | 0,465   |
| Control + vehicle | Control + nafamostat | 0,145   |
| Control + vehicle | Colitis + vehicle    | <0,001  |
| Colitis + vehicle | Colitis + UAMC-00050 | <0,001  |
| Colitis + vehicle | Colitis + nafamostat | 0,009   |

## 7. Immunohistochemistry mast cell tryptase

- Data are not normally distributed (Shapiro-Wilk).
- Equality of variances cannot be assumed (Levene’s test)
- Non-parametric testing was performed on these data with Kruskal-Wallis test and pairwise comparisons
- p-values

| Sample 1 – Sample 2                   | p-value |
|---------------------------------------|---------|
| Control muscularis-Colitis muscularis | 0,312   |
| Control muscularis-Control submucosa  | 0,060   |
| Control muscularis-Colitis submucosa  | 0,010   |
| Control muscularis-Control mucosa     | 0,000   |
| Control muscularis-Colitis mucosa     | 0,000   |
| Colitis muscularis-Control submucosa  | 0,385   |
| Colitis muscularis-Colitis submucosa  | 0,115   |
| Colitis muscularis-Control mucosa     | 0,000   |
| Colitis muscularis-Colitis mucosa     | 0,000   |
| Control submucosa-Colitis submucosa   | 0,479   |
| Control submucosa-Control mucosa      | 0,007   |
| Control submucosa-Colitis mucosa      | 0,001   |
| Colitis submucosa-Control mucosa      | 0,049   |
| Colitis submucosa-Colitis mucosa      | 0,013   |
| Control mucosa-Colitis mucosa         | 0,616   |

Each row tests the null hypothesis that the Sample 1 and Sample 2 distributions are the same.

### 8. Proteolytic activities colon

- Data are not normally distributed for TL\_Boc, TL\_Toc, CatG, NEI, PEI, KLK. Data are normally distributed for CL (Shapiro-Wilk).
- Equality of variances can be assumed for TL\_Boc, TL\_Toc, CL, CatG, NEI, KLK. Equality of variances cannot be assumed for PEI (Levene's test).
- Non-parametric testing was performed on these data to compare acute colitis + vehicle with acute colitis + UAMC-00050 using Mann Whitney U test.
- p-values

| Variable | p-value |
|----------|---------|
| TL_Boc   | 0,245   |
| TL_Toc   | 0,439   |
| CL       | 0,197   |
| CatG     | 0,697   |
| NEI      | 0,053   |
| PEI      | 0,028   |
| KLK      | 0,090   |

### 9. Fecal protease activity azocasein assay

- Data are not normally distributed (Shapiro-Wilk).
- Equality of variances cannot be assumed (Levene's test).
- Non-parametric testing was performed on these data to compare control with acute colitis group with Wilcoxon matched-pairs signed-rank test
- p-value: 0,006

### 10. Proteolytic activities fecal samples

- Data are not normally distributed for CL, NEI, CatG. Data are normally distributed for TL\_Boc, TL\_Toc, PEI, KLK (Shapiro-Wilk).
- Equality of variances can be assumed for TL\_Boc, TL\_Toc, PEI, NEI, KLK. Equality of variances cannot be assumed for CL and CatG (Levene's test).
- Two-way ANOVA was performed for TL\_Boc, TL\_Toc, PEI, KLK. No interaction effect was found. A significant effect of condition was found for PEI and KLK. A significant effect for treatment was found for PEI. Unpaired T-tests + Bonferroni correction
- Nonparametric testing was performed for CL, NEI, CatG. Tested for main effects via reduced model split file and Mann Whitney U test + Bonferroni correction
- p-values Two-Way ANOVA - condition \* treatment

| Variable | p-value |
|----------|---------|
| TL_Boc   | 0,692   |
| TL_Toc   | 0,622   |
| PEI      | 0,929   |
| KLK      | 0,809   |



➤ p-values Two-Way ANOVA - condition

| Variable | p-value |
|----------|---------|
| TL_Boc   | 0,898   |
| TL_Toc   | 0,937   |
| PEI      | 0,021   |
| KLK      | 0,019   |

➤ p-values Two-Way ANOVA – treatment

| Variable | p-value |
|----------|---------|
| TL_Boc   | 0,133   |
| TL_Toc   | 0,066   |
| PEI      | 0,000   |
| KLK      | 0,127   |

➤ p-values unpaired T-test – effect of treatment in control animals

| Variable | p-value |
|----------|---------|
| PEI      | 0,004   |

➤ p-values unpaired T-test – effect of treatment in acute colitis animals

| Variable | p-value |
|----------|---------|
| PEI      | 0,006   |

➤ p-values unpaired T-test – effect of condition in vehicle-treated animals

| Variable | p-value |
|----------|---------|
| PEI      | 0,014   |
| KLK      | 0,118   |

➤ p-values unpaired T-test – effect of condition in UAMC-treated animals

| Variable | p-value |
|----------|---------|
| PEI      | 0,184   |
| KLK      | 0,075   |

➤ p-values Mann Whitney U – effect of treatment in control animals

| Variable | p-value |
|----------|---------|
| CL       | 0,110   |
| CatG     | 0,600   |
| NEI      | 1,000   |

➤ p-values Mann Whitney U – effect of treatment in acute colitis animals

| Variable | p-value |
|----------|---------|
| CL       | 0,218   |
| CatG     | 0,200   |
| NEI      | 0,056   |

Supplementary file 1 - Details on statistical analysis of all data included in the manuscript

- p-values Mann Whitney U – effect of condition in vehicle-treated animals

| <b>Variable</b> | <b>p-value</b> |
|-----------------|----------------|
| CL              | 0,156          |
| CatG            | <b>0,032</b>   |
| NEI             | 0,332          |

- p-values Mann Whitney U – effect of condition in UAMC-treated animals

| <b>Variable</b> | <b>p-value</b> |
|-----------------|----------------|
| CL              | 0,218          |
| CatG            | 0,400          |
| NEI             | 1,000          |
