# Supplementary material for: The Effect of Serine Protease Inhibitors on Visceral Pain in Different Rodent Models With an Intestinal Insult
Source: Frontiers journal article supplement (doi:10.3389/fphar.2022.765744), 2022-06-02
Supplement: Data_Sheet_2.pdf [file Data_Sheet_2.pdf]

For microscopic evaluation of inflammation in the mouse colon, a colonic segment was fixed in 4% formaldehyde for 24h and embedded in paraffin for hematoxylin & eosin staining.

H&E stainings from control and neonatal acetic acid-induced IBS mice (n=6/group) were microscopically scored using a previously published scoring system (Heylen et al., 2013; Van Spaendonk et al., 2021). Briefly, the following parameters were scored: degree of inflammatory infiltrates (0-3), presence of goblet cells (0-1), changes in crypt architecture (0-3), presence of crypt abscesses (0-1), presence of mucosal erosion and/or ulceration (0-1) and the number of layers involved in inflammation from mucosal towards transmural involvement (0-3), resulting in a total score ranging between 0 and 13. The samples were scored in a blinded way and all parameters showed a score of 0 both in control mice and neonatal acetic acid mice. Representative images from an H&E staining of the colon of a control and IBS mouse are shown in **Figure 1**.

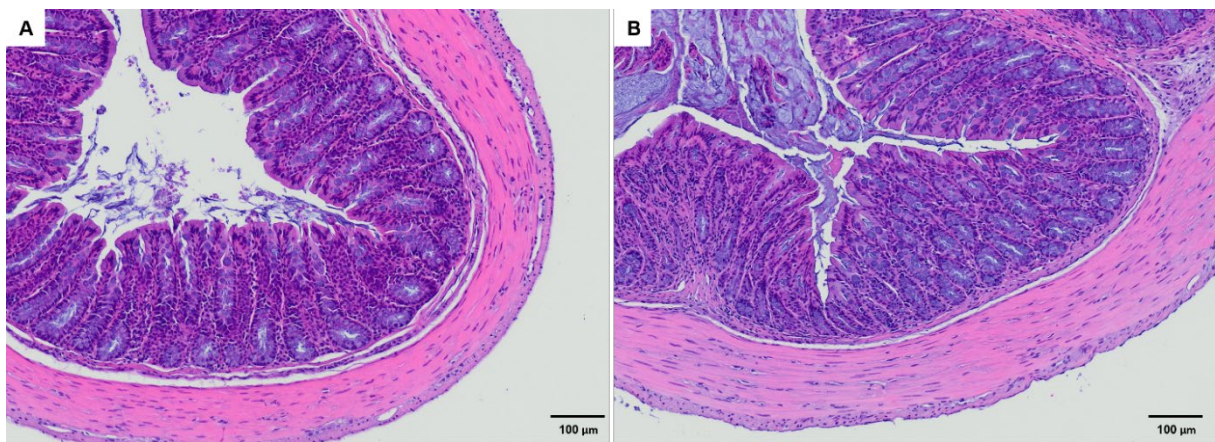

**Figure 1.** Representative image from an H&E staining of the colon of a control (A) and a neonatal acetic acid-induced IBS mouse (B) in their adulthood.

Next to H&E stainings, mRNA cytokine levels (IL-10, IL-12, IL1B, TNF $\alpha$ , IL6, IL8,) were quantified by RT-qPCR using a previously published method (Plaek et al., 2020) in colon samples from control vs acetic acid-induced IBS mice. The sequences of the primers as well as the housekeeping genes used (*Rpl4* and *Rps29*) are shown in **Table 1**. No significant differences were found between control and IBS mice (**Figure 2**).

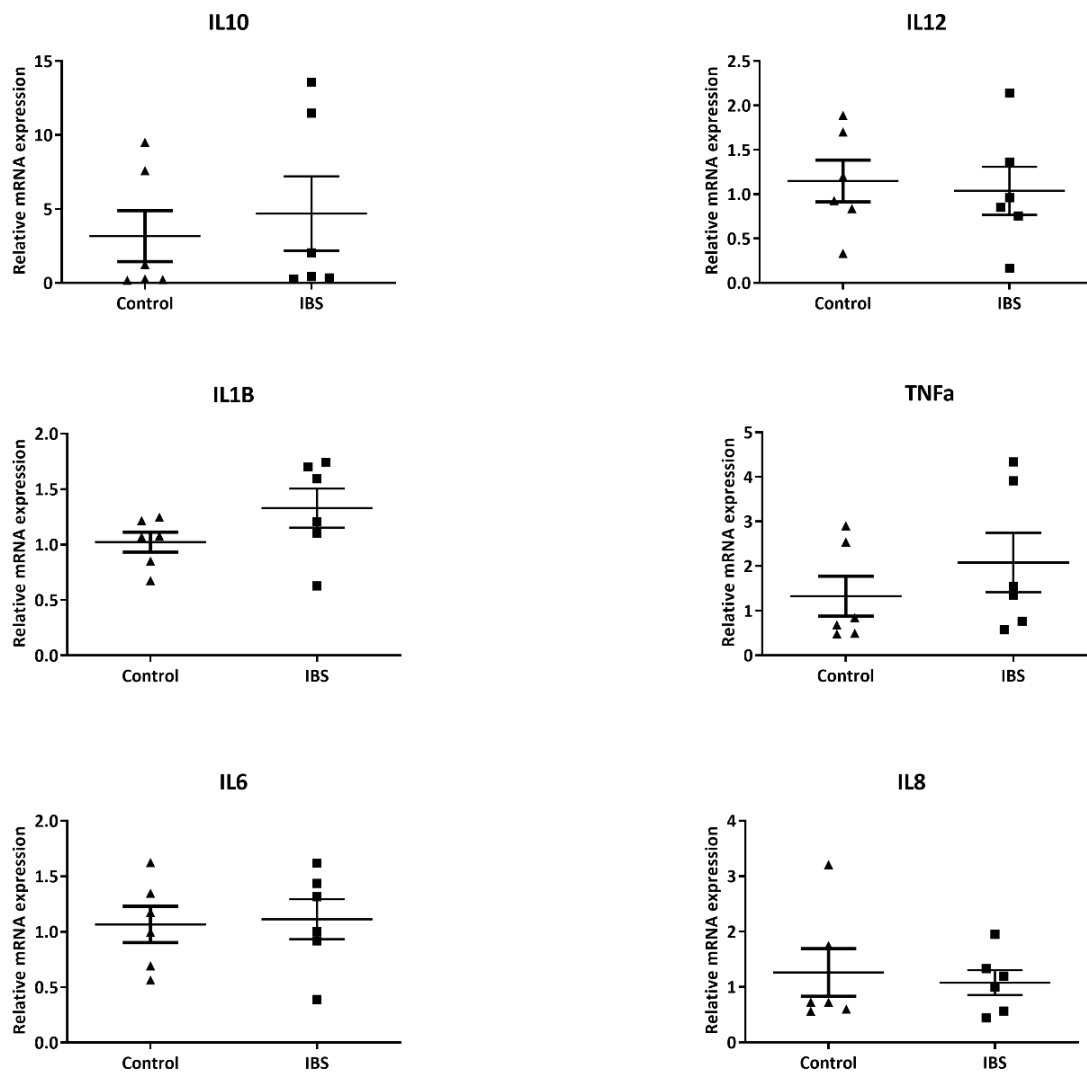

**Figure 2.** mRNA cytokine levels (IL-10, IL-12, IL-1B, TNFa, IL6, IL8) in colon samples from control vs acetic acid-induced IBS mice. Unpaired T-test (IL-12, IL-1B, IL-6) or Mann-Whitney U test (IL-10, TNFa, IL8). No significant differences were found between control and IBS mice.

**Table 1.** SYBR Green primers used for RT-qPCR analysis of mouse colonic samples

| Primer name   | Sequence 5'-3'            |
|---------------|---------------------------|
| m_RPL4_FW     | CCGTCCCCTCATATCGGTGTA     |
| m_RPL4_REV    | GCATAGGGCTGTCTGTTGTTTT    |
| m_RPS29_FW    | GTCTGATCCGCAAATACGGG      |
| m_RPS29_REV   | AGCCTATGTCCTTCGCGTACT     |
| IL-10_m_FW    | GCTCTTACTGACTGGCATGAG     |
| IL-10_m_REV   | CGCAGCTCAGGAGCATGTG       |
| IL12_m_FW     | CAATCACGCTACCTCCTCTTT     |
| IL12_m_REV    | CAGCAGTGCAGGAATAATGTTTC   |
| IL1beta_m_FW  | GAAATGCCACCTTTTGACAGTG    |
| IL1beta_m_REV | TGGATGCTCTCATCAGGACAG     |
| TNFalfa_m_FW  | CAGGCGGTGCCTATGTCTC       |
| TNFalfa_m_REV | CGATCACCCGAAGTTCAGTAG     |
| IL-6_m_FW     | ACACATGTTCTCTGGGAAATCGTGG |
| IL-6_m_REV    | TCTGCAAGTGCATCATCGTTGTCA  |
| IL8_m_FW      | TCGAGACCATTACTGCAACAG     |
| IL8_m_REV     | CATTGCCGGTGGAAATTCCTT     |

## References

- Heylen, M., Deleye, S., De Man, J.G., Ruysers, N.E., Vermeulen, W., Stroobants, S., et al. (2013). Colonoscopy and  $\mu$ PET/CT are valid techniques to monitor inflammation in the adoptive transfer colitis model in mice. *Inflamm Bowel Dis* 19(5), 967-976. doi: 10.1097/MIB.0b013e3182802c7c.
- Plaeke, P., De Man, J.G., Smet, A., Malhotra-Kumar, S., Pintelon, I., Timmermans, J.P., et al. (2020). Effects of intestinal alkaline phosphatase on intestinal barrier function in a cecal ligation and puncture (CLP)-induced mouse model for sepsis. *Neurogastroenterol Motil* 32(3), e13754. doi: 10.1111/nmo.13754.
- Van Spaendonk, H., Ceuleers, H., Smet, A., Berg, M., Joossens, J., Van der Veken, P., et al. (2021). The Effect of a Novel Serine Protease Inhibitor on Inflammation and Intestinal Permeability in a Murine Colitis Transfer Model. *Frontiers in Pharmacology* 12(1601). doi: 10.3389/fphar.2021.682065.
